# Supplementary material for: Chemical Synthesis and Structure–Activity Relationship Studies of the Coagulation Factor Xa Inhibitor Tick Anticoagulant Peptide from the Hematophagous Parasite Ornithodoros moubata
Source: MDPI journal article supplement (doi:10.3390/biomimetics9080485), 2024-08-12
Supplement: s1 [file biomimetics-3124002-supplementary.pdf › biomimetics-3124002-supplementary.pdf]

## SUPPLEMENTARY MATERIALS

### **Chemical Synthesis and Structure-Activity Relationship Studies of the Coagulation Factor Xa Inhibitor Tick Anticoagulant Peptide from the Hematophagous Parasite *Ornithodoros moubata***

Vincenzo De Filippis <sup>1, \*</sup>, Laura Acquasaliente <sup>1</sup>, Andrea Pierangelini <sup>1</sup>, Oriano Marin <sup>2</sup>

<sup>1</sup> Laboratory of Protein Chemistry & Molecular Haematology, Department of Pharmaceutical and Pharmacological Sciences, School of Medicine, University of Padova. <sup>2</sup> Department of Biomedical Sciences, School of Medicine, University of Padova.

**\* To whom correspondence should be addressed:** Prof. Vincenzo De Filippis, Department of Pharmaceutical and Pharmacological Sciences, School of Medicine, University of Padua, via Marzolo 5, Padua, 35131 Italy. Phone: (+39) 0498275698, e-mail: [vincenzo.defilippis@unipd.it](mailto:vincenzo.defilippis@unipd.it)

**Table S1. Mass spectrometry data and molar absorptivity values of the synthetic TAP analogues produced in this study.**

| <b>TAP</b>                     | <b>MW<br/>(experimental)<sup>a</sup><br/>a.m.u</b> | <b>MW<br/>(theoretical)<br/>a.m.u.</b> | <b>Molar absorptivity<sup>b</sup> (ε)<br/>at 280nm<br/>M<sup>-1</sup> ·cm<sup>-1</sup></b> |
|--------------------------------|----------------------------------------------------|----------------------------------------|--------------------------------------------------------------------------------------------|
| WT                             | 6978.3 ± 0.2                                       | 6978.6                                 | 18,140                                                                                     |
| Tyr1 <i>p</i> -aminomethyl-Phe | 6979.3 ± 0.5                                       | 6979.0                                 | 16,860                                                                                     |
| Tyr1 <i>p</i> -amino-Phe       | 6991.4 ± 0.3                                       | 6991.6                                 | 16,860                                                                                     |
| Tyr1 <i>p</i> -guanido-Phe     | 7020.6 ± 0.6                                       | 7019.7                                 | 16,860                                                                                     |
| Tyr1pyridyl-Ala                | 6963.8 ± 0.2                                       | 6963.6                                 | 16,860                                                                                     |
| Tyr1β-nafthyl-Ala              | 7012.9 ± 0.3                                       | 7012.6                                 | 22,240                                                                                     |
| Arg3 <i>p</i> -aminomethyl-Phe | 6999.2 ± 0.1                                       | 6999.0                                 | 18,140                                                                                     |
| Arg3 <i>p</i> -guanido-Phe     | 7026.8 ± 0.4                                       | 7026.6                                 | 18,140                                                                                     |
| Arg3pyridyl-Ala                | 6970.9 ± 0.7                                       | 6970.4                                 | 18,140                                                                                     |

<sup>a</sup> The values reported refer to the average masses; <sup>b</sup> the values were calculated utilizing molar absorption coefficients of 1280 M<sup>-1</sup> cm<sup>-1</sup> for Tyr, 5690 M<sup>-1</sup> cm<sup>-1</sup> for Trp, 120 M<sup>-1</sup> cm<sup>-1</sup> for Cys and 5380 M<sup>-1</sup> cm<sup>-1</sup> for βnaftilAla

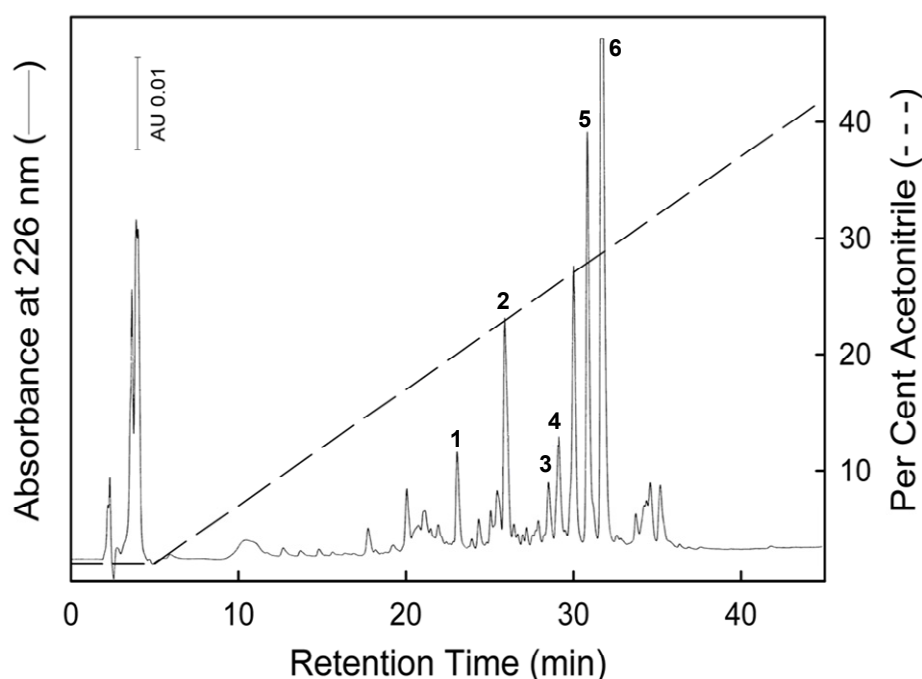

**Supplementary Figure S1.** Determination of S-S bond topology of N-TAP by peptide mass fingerprint analysis. Purified N-TAP was treated (4 h at 40°C) with trypsin and chymotrypsin, immobilised on Sepharose-4B gel. After filtration, the proteolysis reaction was analysed by LC-MS/MS, and the chemical identity of the material eluted in correspondence of the numbered peaks is reported in the **Supplementary Table S2**.

**Table S2. Mass spectrometry data of the peptides obtained by mass fingerprint analysis.**

| Peak | Sequence                                                                                | MW<br>(experimental) <sup>a</sup><br>a.m.u | MW<br>(theoretical)<br>a.m.u. |
|------|-----------------------------------------------------------------------------------------|--------------------------------------------|-------------------------------|
| 1    | <sup>57</sup> NACI <sup>60</sup><br><sup>5</sup> CIKP <sup>8</sup>                      | 1032.7 ± 0.3                               | 1032.0                        |
| 2    | <sup>24</sup> AYF <sup>26</sup>                                                         | 400.2 ± 0.1                                | 400.2                         |
| 3    | <sup>31</sup> GGCDSF <sup>36</sup><br><sup>53</sup> RDCF <sup>56</sup>                  | 1120.3 ± 0.5                               | 1121.6                        |
| 4    | <sup>31</sup> GGCDSF <sup>36</sup><br><sup>54</sup> DCF <sup>56</sup>                   | 965.5 ± 0.2                                | 964.4                         |
| 5    | <sup>9</sup> RDWTDECDSNEGGER <sup>23</sup><br><sup>37</sup> WICPEDHTGADY <sup>48</sup>  | 3027.9 ± 0.6                               | 3027.2                        |
| 6    | <sup>9</sup> RDWTDECDSNEGGER <sup>23</sup><br><sup>37</sup> WICPEDHTGADYY <sup>49</sup> | 3189.6 ± 0.3                               | 3189.6                        |

<sup>a</sup> The values reported refer to the average masses.

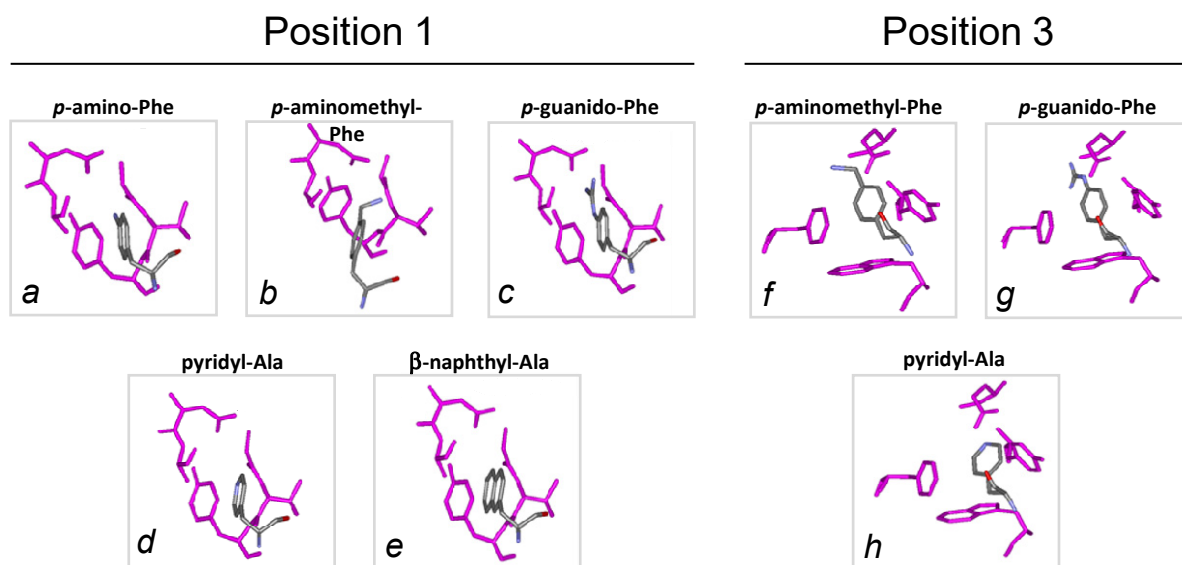

**Supplementary Figure S2. Molecular modelling of TAP analogues interaction with FXa active site.** The structure of the synthetic TAP analogues (color coded) in the fXa-bound (magenta) state was modelled using the MOE ver. 15 software, run on the crystallographic structure of TAP-fXa complex (1kig.pdb).
